# Supplementary material
Source: PubMed Central journal article supplement (PMC10824166)
Supplement: NIHMS1769699-supplement-Appendix_1.pdf [file NIHMS1769699-supplement-Appendix_1.pdf]

# Appendix Document 1: Final Search Strategies

PICO 1: The Diagnostic Accuracy of Serum Ferritin in Iron Deficiency Anemia

Search date: April 6, 2019

Databases searched: Ovid MEDLINE: Epub Ahead of Print, In-Process & Other Non-Indexed Citations, Ovid MEDLINE® Daily and Ovid MEDLINE® 1946-Present, Embase Classic+Embase 1947 to 2019 April 05; Wiley Cochrane Library

## Ovid MEDLINE(R), Embase

| #  | Searches                                                                                                                                                              | Results |
|----|-----------------------------------------------------------------------------------------------------------------------------------------------------------------------|---------|
| 1  | exp Anemia, Iron-Deficiency/ use ppez                                                                                                                                 | 9223    |
| 2  | exp Anemia, Hypochromic/ use ppez                                                                                                                                     | 18373   |
| 3  | exp iron deficiency anemia/ use emczd                                                                                                                                 | 27068   |
| 4  | ((anemia* or anaemia*) adj2 (iron adj2 deficien*)).ti,ab,kf,kw.                                                                                                       | 25876   |
| 5  | or/1-4                                                                                                                                                                | 52160   |
| 6  | exp Ferritins/                                                                                                                                                        | 62192   |
| 7  | exp ferritin blood level/ use emczd                                                                                                                                   | 16766   |
| 8  | (isoferritin* or ferritin*).ti,ab,kw,kf.                                                                                                                              | 67168   |
| 9  | or/6-8                                                                                                                                                                | 84353   |
| 10 | 5 and 9                                                                                                                                                               | 10734   |
| 11 | limit 10 to english language                                                                                                                                          | 9555    |
| 12 | limit 11 to yr="1990 -Current"                                                                                                                                        | 8797    |
| 13 | animals/ not (humans/ and animals/)                                                                                                                                   | 5885698 |
| 14 | 12 not 13                                                                                                                                                             | 8706    |
| 15 | meta-analysis/ or systematic review/ or meta-analysis as topic/ or "meta analysis (topic)"/ or "systematic review (topic)"/ or exp technology assessment, biomedical/ | 525755  |
| 16 | Meta Analysis.pt.                                                                                                                                                     | 99231   |
| 17 | (meta analy* or metaanaly* or health technolog* assess*).ti,ab,kf,kw.                                                                                                 | 348728  |

|    |                                                                                                                                                                                                                                                                                         |        |
|----|-----------------------------------------------------------------------------------------------------------------------------------------------------------------------------------------------------------------------------------------------------------------------------------------|--------|
| 18 | (meta-analy* or metaanaly* or systematic review* or biomedical technology assessment* or bio-medical technology assessment*).mp,hw.<br>(((systematic* or methodologic*) adj3 (review* or overview*)) or pooled analysis or published studies or published literature or hand search* or | 673038 |
| 19 | handsearch* or medline or pub med or pubmed or embase or cochrane or cinahl or data syntheses* or data extraction* or HTA or HTAs or (technolog* adj (assessment* or overview* or appraisal*))).ti,ab,kf,kw.                                                                            | 696373 |
| 20 | (cochrane or (health adj2 technology assessment) or evidence report).jw.                                                                                                                                                                                                                | 43352  |
| 21 | or/15-20                                                                                                                                                                                                                                                                                | 946009 |
| 22 | 14 and 21                                                                                                                                                                                                                                                                               | 276    |
| 23 | remove duplicates from 22                                                                                                                                                                                                                                                               | 215    |

### Wiley Cochrane Library

|    |                                                                                                     |      |
|----|-----------------------------------------------------------------------------------------------------|------|
| #1 | MeSH descriptor: [Anemia, Iron-Deficiency] explode all trees                                        | 1116 |
| #2 | MeSH descriptor: [Anemia, Hypochromic] explode all trees                                            | 1348 |
| #3 | ((anemia* or anaemia*) NEAR/2 (iron NEAR/2 deficien*)):ti,ab                                        | 1455 |
| #4 | #1 OR #2 OR #3                                                                                      | 2230 |
| #5 | MeSH descriptor: [Ferritins] explode all trees                                                      | 967  |
| #6 | (isoferritin* or ferritin*):ti,ab                                                                   | 3330 |
| #7 | #5 OR #6                                                                                            | 3492 |
| #8 | #4 and #7 with Cochrane Library publication date Between Jan 1990 and Apr 2019, in Cochrane Reviews | 6    |

## PICO 2: The Prevalence of Malignant Lesions in Patients with Iron Deficiency Anemia

Search date: April 9, 2019

Databases searched: Ovid MEDLINE: Epub Ahead of Print, In-Process & Other Non-Indexed Citations, Ovid MEDLINE® Daily and Ovid MEDLINE® 1946-Present, Embase Classic+Embase 1947 to 2019 April 08 ; Wiley Cochrane Library.

### Ovid MEDLINE(R), Embase

| # | Searches                                                        | Results |
|---|-----------------------------------------------------------------|---------|
| 1 | exp Anemia, Iron-Deficiency/ use ppez                           | 9226    |
| 2 | exp Anemia, Hypochromic/ use ppez                               | 18376   |
| 3 | exp iron deficiency anemia/ use emczd                           | 27071   |
| 4 | ((anemia* or anaemia*) adj2 (iron adj2 deficien*)):ti,ab,kf,kw. | 25881   |
| 5 | or/1-4                                                          | 52167   |

|    |                                                                                                                                                                                                                           |         |
|----|---------------------------------------------------------------------------------------------------------------------------------------------------------------------------------------------------------------------------|---------|
| 6  | exp Gastrointestinal Neoplasms/ use ppez                                                                                                                                                                                  | 357012  |
| 7  | exp esophagus cancer/ use emczd or exp intestine cancer/ use emczd or exp stomach cancer/ use emczd                                                                                                                       | 437815  |
| 8  | ((Gastrointestinal or esophag* or oesophag* or stomach or gastric or bowel* or intestin* or colorectal or colon) adj2 (cancer* or malignan* or neoplasm* or tumour* or tumor* or carcinoma*)):ti,kf,kw.                   | 457043  |
| 9  | or/6-8                                                                                                                                                                                                                    | 889923  |
| 10 | 5 and 9                                                                                                                                                                                                                   | 2223    |
| 11 | limit 10 to english language                                                                                                                                                                                              | 1948    |
| 12 | limit 11 to yr="1990 -Current"                                                                                                                                                                                            | 1787    |
| 13 | animals/ not (humans/ and animals/)                                                                                                                                                                                       | 5886111 |
| 14 | 12 not 13                                                                                                                                                                                                                 | 1784    |
| 15 | limit 14 to (case reports or comment or editorial or letter or note) [Limit not valid in Ovid MEDLINE(R),Ovid MEDLINE(R) Daily Update,Ovid MEDLINE(R) In-Process,Ovid MEDLINE(R) Publisher,Embase; records were retained] | 383     |
| 16 | Case Report/                                                                                                                                                                                                              | 4402125 |
| 17 | 14 not (15 or 16)                                                                                                                                                                                                         | 1037    |
| 18 | remove duplicates from 17                                                                                                                                                                                                 | 878     |

### Wiley Cochrane Library

|    |                                                                                                                                                                                                       |       |
|----|-------------------------------------------------------------------------------------------------------------------------------------------------------------------------------------------------------|-------|
| ID | Search Hits                                                                                                                                                                                           |       |
| #1 | MeSH descriptor: [Anemia, Iron-Deficiency] explode all trees                                                                                                                                          | 1116  |
| #2 | MeSH descriptor: [Anemia, Hypochromic] explode all trees                                                                                                                                              | 1348  |
| #3 | ((anemia* or anaemia*) NEAR/2 (iron NEAR/2 deficien*)):ti,ab                                                                                                                                          | 1455  |
| #4 | #1 OR #2 OR #3                                                                                                                                                                                        | 2230  |
| #5 | MeSH descriptor: [Gastrointestinal Neoplasms] explode all trees                                                                                                                                       | 10996 |
| #6 | ((Gastrointestinal or esophag* or oesophag* or stomach or gastric or bowel* or intestin* or colorectal or colon) near/2 (cancer* or malignan* or neoplasm* or tumour* or tumor* or carcinoma*)):ti,ab | 23890 |
| #7 | #5 or #6                                                                                                                                                                                              | 27141 |
| #8 | #4 AND #7 with Cochrane Library publication date Between Jan 1990 and Apr 2019, in Cochrane Reviews, Trials                                                                                           | 44    |

PICO 3: The Prevalence of Celiac Disease in Patients with Iron Deficiency Anemia

Search date: April 19, 2019

Databases searched: Ovid MEDLINE: Epub Ahead of Print, In-Process & Other Non-Indexed Citations, Ovid MEDLINE® Daily and Ovid MEDLINE® 1946-Present, Embase Classic+Embase 1947 to 2019 April 18; Wiley Cochrane

### Ovid MEDLINE(R), Embase

| #  | Searches                                                                                                                                                                                                                  | Results |
|----|---------------------------------------------------------------------------------------------------------------------------------------------------------------------------------------------------------------------------|---------|
| 1  | exp Anemia, Iron-Deficiency/ use ppez                                                                                                                                                                                     | 9252    |
| 2  | exp Anemia, Hypochromic/ use ppez                                                                                                                                                                                         | 18402   |
| 3  | exp iron deficiency anemia/ use emczd                                                                                                                                                                                     | 27147   |
| 4  | ((anemia* or anaemia*) adj2 (iron adj2 deficien*)).ti,ab,kf,kw.                                                                                                                                                           | 25964   |
| 5  | or/1-4                                                                                                                                                                                                                    | 52283   |
| 6  | exp Celiac Disease/                                                                                                                                                                                                       | 51810   |
| 7  | ((gluten adj2 enteropath*) or sprue or celiac or coeliac).ti,ab,kf,kw.                                                                                                                                                    | 71437   |
| 8  | 6 or 7                                                                                                                                                                                                                    | 81986   |
| 9  | 5 and 8                                                                                                                                                                                                                   | 1964    |
| 10 | limit 9 to english language                                                                                                                                                                                               | 1735    |
| 11 | limit 10 to yr="1990 -Current"                                                                                                                                                                                            | 1614    |
| 12 | animals/ not (humans/ and animals/)                                                                                                                                                                                       | 5891631 |
| 13 | 11 not 12                                                                                                                                                                                                                 | 1614    |
| 14 | limit 13 to (case reports or comment or editorial or letter or note) [Limit not valid in Ovid MEDLINE(R),Ovid MEDLINE(R) Daily Update,Ovid MEDLINE(R) In-Process,Ovid MEDLINE(R) Publisher,Embase; records were retained] | 283     |
| 15 | Case Report/                                                                                                                                                                                                              | 4410809 |
| 16 | 13 not (14 or 15)                                                                                                                                                                                                         | 1058    |
| 17 | remove duplicates from 16                                                                                                                                                                                                 | 826     |

### Wiley Cochrane Library

| ID | Search Hits                                                       |      |
|----|-------------------------------------------------------------------|------|
| #1 | MeSH descriptor: [Anemia, Iron-Deficiency] explode all trees      | 1116 |
| #2 | MeSH descriptor: [Anemia, Hypochromic] explode all trees          | 1348 |
| #3 | ((anemia* or anaemia*) NEAR/2 (iron NEAR/2 deficien*)):ti,ab      | 1455 |
| #4 | #1 OR #2 OR #3                                                    | 2230 |
| #5 | MeSH descriptor: [Celiac Disease] explode all trees               | 303  |
| #6 | ((gluten near/2 enteropath*) or sprue or celiac or coeliac):ti,ab | 1016 |
| #7 | #5 or #6                                                          | 1078 |
| #8 | #4 and #7                                                         | 22   |

## PICO 4: Treatment of H. Pylori in Patients with Iron Deficiency Anemia

Search date: March 30, 2019

Databases searched: Ovid MEDLINE: Epub Ahead of Print, In-Process & Other Non-Indexed Citations, Ovid MEDLINE® Daily and Ovid MEDLINE® 1946-Present, Embase Classic+Embase 1947 to 2019 April 05 ; Wiley Cochrane Library

### Ovid MEDLINE(R), Embase

| #  | Searches                                                                                                                                                                                                                                                                                | Results |
|----|-----------------------------------------------------------------------------------------------------------------------------------------------------------------------------------------------------------------------------------------------------------------------------------------|---------|
| 1  | exp Anemia, Iron-Deficiency/ use ppez                                                                                                                                                                                                                                                   | 9223    |
| 2  | exp Anemia, Hypochromic/ use ppez                                                                                                                                                                                                                                                       | 18373   |
| 3  | exp iron deficiency anemia/ use emczd                                                                                                                                                                                                                                                   | 27068   |
| 4  | ((anemia* or anaemia*) adj2 (iron adj2 deficien*)).ti,ab,kf,kw.                                                                                                                                                                                                                         | 25876   |
| 5  | or/1-4                                                                                                                                                                                                                                                                                  | 52160   |
| 6  | exp Helicobacter pylori/                                                                                                                                                                                                                                                                | 85487   |
| 7  | exp Helicobacter Infections/                                                                                                                                                                                                                                                            | 57635   |
| 8  | exp Campylobacter/ use ppez                                                                                                                                                                                                                                                             | 11583   |
| 9  | (pylori adj2 (h or helicobacter)).ti,ab,kf,kw.                                                                                                                                                                                                                                          | 97288   |
| 10 | or/6-9                                                                                                                                                                                                                                                                                  | 124913  |
| 11 | 5 and 10                                                                                                                                                                                                                                                                                | 1208    |
| 12 | limit 11 to english language                                                                                                                                                                                                                                                            | 1067    |
| 13 | animals/ not (humans/ and animals/)                                                                                                                                                                                                                                                     | 5885698 |
| 14 | 12 not 13                                                                                                                                                                                                                                                                               | 1063    |
| 15 | meta-analysis/ or systematic review/ or meta-analysis as topic/ or "meta analysis (topic)"/ or "systematic review (topic)"/ or exp technology assessment, biomedical/                                                                                                                   | 525755  |
| 16 | Meta Analysis.pt.                                                                                                                                                                                                                                                                       | 99231   |
| 17 | (meta analy* or metaanaly* or health technolog* assess*).ti,ab,kf,kw.                                                                                                                                                                                                                   | 348728  |
| 18 | (meta-analy* or metaanaly* or systematic review* or biomedical technology assessment* or bio-medical technology assessment*).mp,hw.<br>(((systematic* or methodologic*) adj3 (review* or overview*)) or pooled analysis or published studies or published literature or hand search* or | 673038  |
| 19 | handsearch* or medline or pub med or pubmed or embase or cochrane or cinahl or data synthes* or data extraction* or HTA or HTAs or (technolog* adj (assessment* or overview* or appraisal*)).ti,ab,kf,kw.                                                                               | 696373  |
| 20 | (cochrane or (health adj2 technology assessment) or evidence report).jw.                                                                                                                                                                                                                | 43352   |

|    |                                                                                                                                                                                                                                                                                                                                                                                                                                                                                                                                                                                                               |         |
|----|---------------------------------------------------------------------------------------------------------------------------------------------------------------------------------------------------------------------------------------------------------------------------------------------------------------------------------------------------------------------------------------------------------------------------------------------------------------------------------------------------------------------------------------------------------------------------------------------------------------|---------|
| 21 | (Randomized Controlled Trial or Pragmatic Clinical Trial).pt. or exp Randomized Controlled Trials as Topic/ or "Randomized Controlled Trial (topic)"/ or Randomized Controlled Trial/ or Randomization/ or Random Allocation/ or Double-Blind Method/ or Double Blind Procedure/ or Double-Blind Studies/ or Single-Blind Method/ or Single Blind Procedure/ or Single-Blind Studies/ or Placebos/ or Placebo/ or (random* or sham or placebo*).ti,ab,hw,kf,kw. or ((singl* or doubl*) adj (blind* or dumm* or mask*)).ti,ab,hw,kf,kw. or ((tripl* or trebl*) adj (blind* or dumm* or mask*)).ti,ab,hw,kf,kw. | 3339146 |
| 22 | or/15-21                                                                                                                                                                                                                                                                                                                                                                                                                                                                                                                                                                                                      | 3966314 |
| 23 | 14 and 22                                                                                                                                                                                                                                                                                                                                                                                                                                                                                                                                                                                                     | 157     |
| 24 | remove duplicates from 23                                                                                                                                                                                                                                                                                                                                                                                                                                                                                                                                                                                     | 124     |

### Wiley Cochrane

|    |                                                              |      |
|----|--------------------------------------------------------------|------|
| #1 | MeSH descriptor: [Anemia, Iron-Deficiency] explode all trees | 1116 |
| #2 | MeSH descriptor: [Anemia, Hypochromic] explode all trees     | 1348 |
| #3 | ((anemia* or anaemia*) NEAR/2 (iron NEAR/2 deficien*)):ti,ab | 1455 |
| #4 | #1 OR #2 OR #3                                               | 2230 |
| #5 | MeSH descriptor: [Helicobacter Infections] explode all trees | 2042 |
| #6 | MeSH descriptor: [Helicobacter pylori] explode all trees     | 1929 |
| #7 | (pylori NEAR/2 (h or helicobacter)):ti,ab                    | 5241 |
| #8 | #5 or #6 or #7                                               | 5306 |
| #9 | #4 and #8                                                    | 49   |

## PICO 5: The Use of Video Capsule Endoscopy in Patients with Iron Deficiency Anemia

Search date: April 14, 2019

Databases searched: Ovid MEDLINE: Epub Ahead of Print, In-Process & Other Non-Indexed Citations, Ovid MEDLINE® Daily and Ovid MEDLINE® 1946-Present, Embase Classic+Embase 1947 to 2019 April 18; Wiley Cochrane

### Ovid MEDLINE(R), Embase

| # | Searches                                                        | Results |
|---|-----------------------------------------------------------------|---------|
| 1 | exp Anemia, Iron-Deficiency/ use ppez                           | 9252    |
| 2 | exp Anemia, Hypochromic/ use ppez                               | 18402   |
| 3 | exp iron deficiency anemia/ use emczd                           | 27147   |
| 4 | ((anemia* or anaemia*) adj2 (iron adj2 deficien*)):ti,ab,kf,kw. | 25964   |
| 5 | or/1-4                                                          | 52283   |

|    |                                                                                                                                                                                                                                                                                                                                                  |         |
|----|--------------------------------------------------------------------------------------------------------------------------------------------------------------------------------------------------------------------------------------------------------------------------------------------------------------------------------------------------|---------|
| 6  | exp Capsule Endoscopy/                                                                                                                                                                                                                                                                                                                           | 10963   |
| 7  | exp Capsule Endoscopes/ use ppez                                                                                                                                                                                                                                                                                                                 | 505     |
| 8  | exp capsule endoscope/ use emczd                                                                                                                                                                                                                                                                                                                 | 1333    |
| 9  | ((capsule* or videocapsule* or wireless) adj2 (endoscop* or enteroscop*)) or pillcam* or pill cam* or (capsule* adj2 (wireless or camera* or video or disposable* or ingestible* or m2a or olympus)) or videocapsule* or endo?capsule* or WCE or (given adj (imaging or diagnostic*)) or mirocam or capsocam or intromedic or omom).ti,ab,kf,kw. | 13557   |
| 10 | or/6-9                                                                                                                                                                                                                                                                                                                                           | 16096   |
| 11 | 5 and 10                                                                                                                                                                                                                                                                                                                                         | 1158    |
| 12 | limit 11 to english language                                                                                                                                                                                                                                                                                                                     | 1048    |
| 13 | limit 12 to yr="2000 -Current"                                                                                                                                                                                                                                                                                                                   | 1048    |
| 14 | animals/ not (humans/ and animals/)                                                                                                                                                                                                                                                                                                              | 5891631 |
| 15 | 13 not 14                                                                                                                                                                                                                                                                                                                                        | 1048    |
| 16 | limit 15 to (case reports or comment or editorial or letter or note) [Limit not valid in Ovid MEDLINE(R),Ovid MEDLINE(R) Daily Update,Ovid MEDLINE(R) In-Process,Ovid MEDLINE(R) Publisher,Embase; records were retained]                                                                                                                        | 187     |
| 17 | Case Report/                                                                                                                                                                                                                                                                                                                                     | 4410809 |
| 18 | 15 not (16 or 17)                                                                                                                                                                                                                                                                                                                                | 632     |
| 19 | remove duplicates from 18                                                                                                                                                                                                                                                                                                                        | 525     |

### Wiley Cochrane

|    |                                                                                                                                                                                                                                                                                                                                                |      |
|----|------------------------------------------------------------------------------------------------------------------------------------------------------------------------------------------------------------------------------------------------------------------------------------------------------------------------------------------------|------|
| #1 | MeSH descriptor: [Anemia, Iron-Deficiency] explode all trees                                                                                                                                                                                                                                                                                   | 1116 |
| #2 | MeSH descriptor: [Anemia, Hypochromic] explode all trees                                                                                                                                                                                                                                                                                       | 1348 |
| #3 | ((anemia* or anaemia*) NEAR/2 (iron NEAR/2 deficien*)):ti,ab                                                                                                                                                                                                                                                                                   | 1455 |
| #4 | #1 OR #2 OR #3                                                                                                                                                                                                                                                                                                                                 | 2230 |
| #5 | MeSH descriptor: [Capsule Endoscopy] explode all trees                                                                                                                                                                                                                                                                                         | 118  |
| #6 | MeSH descriptor: [Capsule Endoscopes] explode all trees                                                                                                                                                                                                                                                                                        | 23   |
| #7 | ((capsule* or videocapsule* or wireless) NEAR/2 (endoscop* or enteroscop*)) or pillcam* or pill cam* or (capsule* NEAR/2 (wireless or camera* or video or disposable* or ingestible* or m2a or olympus)) or videocapsule* or endo?capsule* or WCE or (given NEAR (imaging or diagnostic*)) or mirocam or capsocam or intromedic or omom):ti,ab | 272  |
| #8 | #5 or #6 or #7                                                                                                                                                                                                                                                                                                                                 | 385  |
| #9 | #4 AND #8                                                                                                                                                                                                                                                                                                                                      | 7    |
