# Supplementary material
Source: PubMed Central journal article supplement (PMC10824166)
Supplement: NIHMS1769699-supplement-Appendix_2.pdf [file NIHMS1769699-supplement-Appendix_2.pdf]

Appendix 2A. Diagnostic Accuracy of Different Ferritin Thresholds

| Cut-off 15                                                                                                                                                                                                                                            |      |      |      |     |              |       |             |
|-------------------------------------------------------------------------------------------------------------------------------------------------------------------------------------------------------------------------------------------------------|------|------|------|-----|--------------|-------|-------------|
| TP                                                                                                                                                                                                                                                    | 474  | FN   | 335  | PPV | 0.96         | Total | 2669        |
| TN                                                                                                                                                                                                                                                    | 1840 | FP   | 20   | NPV | 0.85         |       |             |
| Sens                                                                                                                                                                                                                                                  | 0.59 | Spec | 0.99 | LR+ | <b>54.49</b> | LR-   | 0.42        |
| Cut-off 25                                                                                                                                                                                                                                            |      |      |      |     |              |       |             |
| TP                                                                                                                                                                                                                                                    | 591  | FN   | 218  | PPV | 0.92         | Total | 2669        |
| TN                                                                                                                                                                                                                                                    | 1811 | FP   | 49   | NPV | 0.89         |       |             |
| Sens                                                                                                                                                                                                                                                  | 0.73 | Spec | 0.97 | LR+ | <b>27.73</b> | LR-   | 0.28        |
| Cut-off 35                                                                                                                                                                                                                                            |      |      |      |     |              |       |             |
| TP                                                                                                                                                                                                                                                    | 649  | FN   | 160  | PPV | 0.87         | Total | 2669        |
| TN                                                                                                                                                                                                                                                    | 1761 | FP   | 99   | NPV | 0.92         |       |             |
| Sens                                                                                                                                                                                                                                                  | 0.80 | Spec | 0.95 | LR+ | <b>15.07</b> | LR-   | <b>0.21</b> |
| Cut-off 45                                                                                                                                                                                                                                            |      |      |      |     |              |       |             |
| TP                                                                                                                                                                                                                                                    | 685  | FN   | 124  | PPV | 0.83         | Total | 2669        |
| TN                                                                                                                                                                                                                                                    | 1718 | FP   | 142  | NPV | 0.93         |       |             |
| Sens                                                                                                                                                                                                                                                  | 0.85 | Spec | 0.92 | LR+ | <b>11.09</b> | LR-   | <b>0.17</b> |
| Cut-off 100                                                                                                                                                                                                                                           |      |      |      |     |              |       |             |
| TP                                                                                                                                                                                                                                                    | 761  | FN   | 48   | PPV | 0.58         | Total | 2669        |
| TN                                                                                                                                                                                                                                                    | 1320 | FP   | 540  | NPV | 0.96         |       |             |
| Sens                                                                                                                                                                                                                                                  | 0.94 | Spec | 0.71 | LR+ | 3.24         | LR-   | <b>0.08</b> |
| TP, true positives; FN, false negatives; PPV, positive predictive value; TN, true negatives; FP, false positives; NPV, negative predictive value; Sens, sensitivity; Spec, specificity; LR+, positive likelihood ratio; LR- negative likelihood ratio |      |      |      |     |              |       |             |
| Source: Guyatt HG et al. J Gen Intern Med 1992;7:145-153                                                                                                                                                                                              |      |      |      |     |              |       |             |

Appendix 2B. Prevalence of Anemia and Iron Deficiency Anemia in Different Age and Gender Groups

| Subjects                                            | N    | Anemic | %Anemic | IDA | %IDA   |
|-----------------------------------------------------|------|--------|---------|-----|--------|
| NHANES I                                            | 9024 | 429    | 4.75%   | 143 | 33.33% |
| Premen Women                                        | 2797 | 158    | 5.65%   | 92  | 58.23% |
| Men & Postmen Women                                 | 6227 | 271    | 4.35%   | 51  | 18.82% |
| Age ≥ 50                                            | 4447 | 207    | 4.65%   | 50  | 24.15% |
| Age ≥ 65                                            | 2733 | 142    | 5.20%   | 32  | 22.54% |
| Source: Ioannou GN et al. Am J Med 2002;113:276-280 |      |        |         |     |        |
