# Supplementary material
Source: PubMed Central journal article supplement (PMC10824166)
Supplement: NIHMS1769699-supplement-Appendix_3.pdf [file NIHMS1769699-supplement-Appendix_3.pdf]

Appendix 3. *Helicobacter pylori* modeling.

|                                                                                                                                                                                                                                                                                                                                                                                                                                                                                                                                                                                                                                                                                                                                                                                                                                                                                                                                                                                                                                                                                                                                                                                                                                                                                                                                                                                                                                                                                                                                                                     | Population                                                                                                                                                                | Adults      |
|---------------------------------------------------------------------------------------------------------------------------------------------------------------------------------------------------------------------------------------------------------------------------------------------------------------------------------------------------------------------------------------------------------------------------------------------------------------------------------------------------------------------------------------------------------------------------------------------------------------------------------------------------------------------------------------------------------------------------------------------------------------------------------------------------------------------------------------------------------------------------------------------------------------------------------------------------------------------------------------------------------------------------------------------------------------------------------------------------------------------------------------------------------------------------------------------------------------------------------------------------------------------------------------------------------------------------------------------------------------------------------------------------------------------------------------------------------------------------------------------------------------------------------------------------------------------|---------------------------------------------------------------------------------------------------------------------------------------------------------------------------|-------------|
| 1                                                                                                                                                                                                                                                                                                                                                                                                                                                                                                                                                                                                                                                                                                                                                                                                                                                                                                                                                                                                                                                                                                                                                                                                                                                                                                                                                                                                                                                                                                                                                                   | Theoretical population count                                                                                                                                              | 1,000,000   |
| 2                                                                                                                                                                                                                                                                                                                                                                                                                                                                                                                                                                                                                                                                                                                                                                                                                                                                                                                                                                                                                                                                                                                                                                                                                                                                                                                                                                                                                                                                                                                                                                   | Estimated prevalence count of anemia in the theoretical population                                                                                                        | 56,500      |
| 3                                                                                                                                                                                                                                                                                                                                                                                                                                                                                                                                                                                                                                                                                                                                                                                                                                                                                                                                                                                                                                                                                                                                                                                                                                                                                                                                                                                                                                                                                                                                                                   | Estimated prevalence count of iron-deficiency anemia (IDA) in the theoretical population                                                                                  | 32,900      |
| 4                                                                                                                                                                                                                                                                                                                                                                                                                                                                                                                                                                                                                                                                                                                                                                                                                                                                                                                                                                                                                                                                                                                                                                                                                                                                                                                                                                                                                                                                                                                                                                   | Estimated prevalence of <i>H. pylori</i> in the United States                                                                                                             | 35.6%       |
| 5                                                                                                                                                                                                                                                                                                                                                                                                                                                                                                                                                                                                                                                                                                                                                                                                                                                                                                                                                                                                                                                                                                                                                                                                                                                                                                                                                                                                                                                                                                                                                                   | Estimated prevalence count of <i>H. pylori</i> infection in IDA patient                                                                                                   | 11,712      |
| 6                                                                                                                                                                                                                                                                                                                                                                                                                                                                                                                                                                                                                                                                                                                                                                                                                                                                                                                                                                                                                                                                                                                                                                                                                                                                                                                                                                                                                                                                                                                                                                   | Urea Breath Test Sensitivity                                                                                                                                              | 96%         |
| 7                                                                                                                                                                                                                                                                                                                                                                                                                                                                                                                                                                                                                                                                                                                                                                                                                                                                                                                                                                                                                                                                                                                                                                                                                                                                                                                                                                                                                                                                                                                                                                   | Urea Breath Test Specificity                                                                                                                                              | 93%         |
| 8                                                                                                                                                                                                                                                                                                                                                                                                                                                                                                                                                                                                                                                                                                                                                                                                                                                                                                                                                                                                                                                                                                                                                                                                                                                                                                                                                                                                                                                                                                                                                                   | Estimated number of missed <i>H. pylori</i> infections due to false negatives                                                                                             | 468         |
| 9                                                                                                                                                                                                                                                                                                                                                                                                                                                                                                                                                                                                                                                                                                                                                                                                                                                                                                                                                                                                                                                                                                                                                                                                                                                                                                                                                                                                                                                                                                                                                                   | Estimated number of patient treated with antibiotics unnecessarily due to false positives                                                                                 | 1483        |
| 10                                                                                                                                                                                                                                                                                                                                                                                                                                                                                                                                                                                                                                                                                                                                                                                                                                                                                                                                                                                                                                                                                                                                                                                                                                                                                                                                                                                                                                                                                                                                                                  | Estimated additional cost of performing routine gastric biopsies (a single biopsy specimen container) to diagnosed <i>H. pylori</i> during the first endoscopic encounter | \$6,436,556 |
| 11                                                                                                                                                                                                                                                                                                                                                                                                                                                                                                                                                                                                                                                                                                                                                                                                                                                                                                                                                                                                                                                                                                                                                                                                                                                                                                                                                                                                                                                                                                                                                                  | Estimated additional cost of performing urea breath testing to diagnose <i>H. pylori</i> then repeating endoscopy for patients who tested negative falsely                | \$3,445,600 |
| 12                                                                                                                                                                                                                                                                                                                                                                                                                                                                                                                                                                                                                                                                                                                                                                                                                                                                                                                                                                                                                                                                                                                                                                                                                                                                                                                                                                                                                                                                                                                                                                  | Estimated additional cost of treating patients who falsely tested positive for <i>H. pylori</i> using urea breath testing                                                 | \$733,438   |
| 13                                                                                                                                                                                                                                                                                                                                                                                                                                                                                                                                                                                                                                                                                                                                                                                                                                                                                                                                                                                                                                                                                                                                                                                                                                                                                                                                                                                                                                                                                                                                                                  | Difference in additional costs between routine biopsies versus indirect testing for <i>H. pylori</i>                                                                      | \$2,257,518 |
| <p>1. A theoretical number of adult people</p> <p>2. Calculated by multiplying the estimated prevalence percentage of anemia from Ioannou GN et al. (2002) by the theoretical population count in line 1{Ioannou, 2002 #2}</p> <p>3. Calculated by multiplying the estimated prevalence percentage of iron-deficiency anemia from Ioannou GN et al. (2002) by the count in line 2{Ioannou, 2002 #2}</p> <p>4. Pooled estimate of <i>H. pylori</i> in the United States from Hooi JKY et al. (2017) {Hooi, 2017 #47}</p> <p>5. Calculated by multiplying the estimated prevalence percentage of <i>H. pylori</i> from 4 by the estimated prevalence count of IDA from 3</p> <p>6-7. From Ferwana M et al. (2015)</p> <p>8. Calculated by multiplying the estimated prevalence count of <i>H. pylori</i> (line 5) by the false negatives rate (1-sensitivity from line 6)</p> <p>9. Calculated by multiplying the false positives rate (1-specificity from line 7) by the estimated count of patients with iron deficiency anemia without <i>H. pylori</i> infection (line 5 subtracted from line 3)</p> <p>10. Calculated by multiplying 3 by the additional cost of performing biopsies</p> <p>11. Calculated by multiplying 3 by the cost of urea breath testing then combined with the product of multiplying 8 by the cost of repeat upper endoscopy with gastric biopsies and staining for <i>H. pylori</i>.</p> <p>12. Calculated by multiplying 9 by the average cost of treating <i>H. pylori</i></p> <p>13. Calculated by subtracting 12 and 11 from 10</p> |                                                                                                                                                                           |             |
