# Supplementary material
Source: PubMed Central journal article supplement (PMC10824166)
Supplement: NIHMS1769699-supplement-Appendix_4.pdf [file NIHMS1769699-supplement-Appendix_4.pdf]

Appendix 4. Celiac disease modeling.

|                                                                                                                                                                                                                                                                                                                                                                                                                                                                                                                                                                                                                                                                                                                                                                                                                                                                                                                                                                                                                                                                                                                                                                                                                                                                                                                                                                                                                                                                                                                                                                                                                                                                                                                                                                                                                                              | Population                                                                                                                                                                                                                                                                                   | Adults      |
|----------------------------------------------------------------------------------------------------------------------------------------------------------------------------------------------------------------------------------------------------------------------------------------------------------------------------------------------------------------------------------------------------------------------------------------------------------------------------------------------------------------------------------------------------------------------------------------------------------------------------------------------------------------------------------------------------------------------------------------------------------------------------------------------------------------------------------------------------------------------------------------------------------------------------------------------------------------------------------------------------------------------------------------------------------------------------------------------------------------------------------------------------------------------------------------------------------------------------------------------------------------------------------------------------------------------------------------------------------------------------------------------------------------------------------------------------------------------------------------------------------------------------------------------------------------------------------------------------------------------------------------------------------------------------------------------------------------------------------------------------------------------------------------------------------------------------------------------|----------------------------------------------------------------------------------------------------------------------------------------------------------------------------------------------------------------------------------------------------------------------------------------------|-------------|
| 1                                                                                                                                                                                                                                                                                                                                                                                                                                                                                                                                                                                                                                                                                                                                                                                                                                                                                                                                                                                                                                                                                                                                                                                                                                                                                                                                                                                                                                                                                                                                                                                                                                                                                                                                                                                                                                            | Theoretical population count                                                                                                                                                                                                                                                                 | 1,000,000   |
| 2                                                                                                                                                                                                                                                                                                                                                                                                                                                                                                                                                                                                                                                                                                                                                                                                                                                                                                                                                                                                                                                                                                                                                                                                                                                                                                                                                                                                                                                                                                                                                                                                                                                                                                                                                                                                                                            | Estimated prevalence count of anemia in the theoretical population                                                                                                                                                                                                                           | 56,500      |
| 3                                                                                                                                                                                                                                                                                                                                                                                                                                                                                                                                                                                                                                                                                                                                                                                                                                                                                                                                                                                                                                                                                                                                                                                                                                                                                                                                                                                                                                                                                                                                                                                                                                                                                                                                                                                                                                            | Estimated prevalence count of iron-deficiency anemia (IDA) in the theoretical population                                                                                                                                                                                                     | 32,900      |
| 4                                                                                                                                                                                                                                                                                                                                                                                                                                                                                                                                                                                                                                                                                                                                                                                                                                                                                                                                                                                                                                                                                                                                                                                                                                                                                                                                                                                                                                                                                                                                                                                                                                                                                                                                                                                                                                            | Estimated prevalence of celiac disease in IDA in the United States                                                                                                                                                                                                                           | 1.15%       |
| 5                                                                                                                                                                                                                                                                                                                                                                                                                                                                                                                                                                                                                                                                                                                                                                                                                                                                                                                                                                                                                                                                                                                                                                                                                                                                                                                                                                                                                                                                                                                                                                                                                                                                                                                                                                                                                                            | Estimated prevalence count of celiac disease in IDA patient                                                                                                                                                                                                                                  | 378         |
| 6                                                                                                                                                                                                                                                                                                                                                                                                                                                                                                                                                                                                                                                                                                                                                                                                                                                                                                                                                                                                                                                                                                                                                                                                                                                                                                                                                                                                                                                                                                                                                                                                                                                                                                                                                                                                                                            | TTG IgA Sensitivity                                                                                                                                                                                                                                                                          | 92.5%       |
| 7                                                                                                                                                                                                                                                                                                                                                                                                                                                                                                                                                                                                                                                                                                                                                                                                                                                                                                                                                                                                                                                                                                                                                                                                                                                                                                                                                                                                                                                                                                                                                                                                                                                                                                                                                                                                                                            | TTG IgA Specificity                                                                                                                                                                                                                                                                          | 97.9%       |
| 8                                                                                                                                                                                                                                                                                                                                                                                                                                                                                                                                                                                                                                                                                                                                                                                                                                                                                                                                                                                                                                                                                                                                                                                                                                                                                                                                                                                                                                                                                                                                                                                                                                                                                                                                                                                                                                            | Estimated number of missed celiac disease patients due to false negatives                                                                                                                                                                                                                    | 28          |
| 9                                                                                                                                                                                                                                                                                                                                                                                                                                                                                                                                                                                                                                                                                                                                                                                                                                                                                                                                                                                                                                                                                                                                                                                                                                                                                                                                                                                                                                                                                                                                                                                                                                                                                                                                                                                                                                            | Estimated number of patients falsely diagnosed with celiac disease based on TTG IgA (false positives)                                                                                                                                                                                        | 683         |
| 10                                                                                                                                                                                                                                                                                                                                                                                                                                                                                                                                                                                                                                                                                                                                                                                                                                                                                                                                                                                                                                                                                                                                                                                                                                                                                                                                                                                                                                                                                                                                                                                                                                                                                                                                                                                                                                           | Estimated additional cost of performing routine small bowel biopsies (a single biopsy specimen container) to diagnosed celiac disease during the first endoscopic encounter (Strategy 1)                                                                                                     | \$2,869,538 |
| 11                                                                                                                                                                                                                                                                                                                                                                                                                                                                                                                                                                                                                                                                                                                                                                                                                                                                                                                                                                                                                                                                                                                                                                                                                                                                                                                                                                                                                                                                                                                                                                                                                                                                                                                                                                                                                                           | Estimated additional cost of starting with TTG IgA before endoscopy, followed by biopsies of TTG IgA-positive patients and iron challenge in TTG-IgA negative patients, then repeat EGD with small bowel biopsies in patients who fail iron challenge (Strategy 2)                           | \$967,695   |
| 12                                                                                                                                                                                                                                                                                                                                                                                                                                                                                                                                                                                                                                                                                                                                                                                                                                                                                                                                                                                                                                                                                                                                                                                                                                                                                                                                                                                                                                                                                                                                                                                                                                                                                                                                                                                                                                           | Estimated additional cost of performing TTG IgA after initial endoscopy, followed by repeat endoscopy with biopsies of TTG IgA-positive patients and iron challenge in TTG-IgA negative patients, then repeat EGD with small bowel biopsies in patients who fail iron challenge (Strategy 3) | \$1,506,181 |
| 13                                                                                                                                                                                                                                                                                                                                                                                                                                                                                                                                                                                                                                                                                                                                                                                                                                                                                                                                                                                                                                                                                                                                                                                                                                                                                                                                                                                                                                                                                                                                                                                                                                                                                                                                                                                                                                           | Difference in additional costs between Strategy 1 versus 2                                                                                                                                                                                                                                   | \$1,901,842 |
| 14                                                                                                                                                                                                                                                                                                                                                                                                                                                                                                                                                                                                                                                                                                                                                                                                                                                                                                                                                                                                                                                                                                                                                                                                                                                                                                                                                                                                                                                                                                                                                                                                                                                                                                                                                                                                                                           | Difference in additional costs between Strategy 1 versus 3                                                                                                                                                                                                                                   | \$1,363,356 |
| <p>1. A theoretical number of adult people from the age/gender group of interest</p> <p>2. Calculated by multiplying the estimated prevalence percentage of anemia from Ioannou GN et al. (2002) by the theoretical population count{Ioannou, 2002 #2}</p> <p>3. Calculated by multiplying the estimated prevalence percentage of iron-deficiency anemia from Ioannou GN et al. (2002) by the count in line 2{Ioannou, 2002 #2}</p> <p>4. Pooled estimate of celiac disease prevalence in IDA in the United States.</p> <p>5. Calculated by multiplying the estimated prevalence percentage of celiac disease in IDA from 4 by the estimated prevalence count of IDA from 3</p> <p>6-7. From Maglione MA et al. (2016)</p> <p>8. Calculated by multiplying the estimated prevalence count of celiac disease (line 5) by the false negatives rate (1-sensitivity from line 6)</p> <p>9. Calculated by multiplying the false positives rate (1-specificity from line 7) by the estimated count of patients with iron deficiency anemia without celiac disease (line 5 subtracted from line 3)</p> <p>10. Calculated by multiplying 3 by the additional cost of performing biopsies</p> <p>11. Calculated by multiplying 3 by the cost of TTG IgA, then added the product of multiplying the cost of obtaining small bowel biopsies by the number of true and false positives, then added the product of multiplying the cost of endoscopy with small bowel biopsies by the number of false negatives.</p> <p>12. Calculated by multiplying 3 by the cost of TTG IgA, then added the product of multiplying the cost of repeating endoscopy with small bowel biopsies by the number of true positive, false positives, and false negatives.</p> <p>13. Calculated by subtracting 11 from 10</p> <p>14. Calculated by subtracting 12 from 10</p> |                                                                                                                                                                                                                                                                                              |             |
